# Supplementary material
Source: HighWire-hosted journal article supplement (https://gh.bmj.com/content/3/1/e000304)
Supplement: inline-supplementary-material-1 [file inline-supplementary-material-1.pdf]

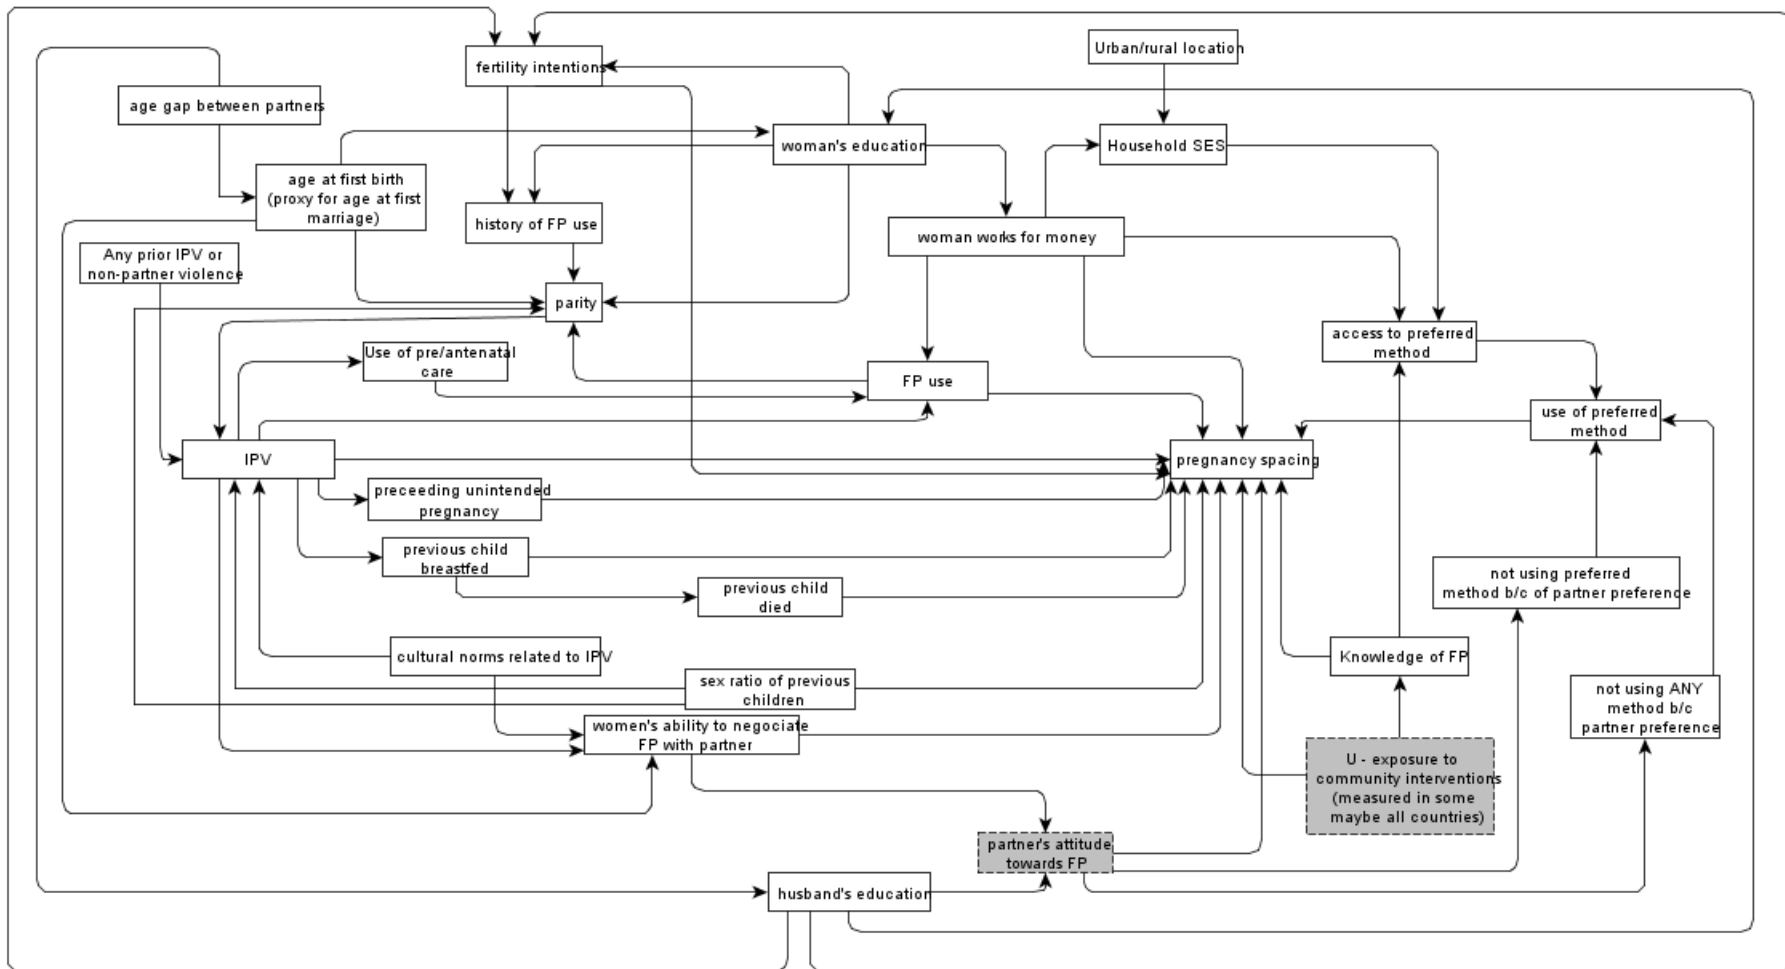

**Figure S5.** Directed acyclic graph representing the hypothesized causal relation between women's experience of IPV and pregnancy spacing.
