# Supplementary material
Source: HighWire-hosted journal article supplement (https://gh.bmj.com/content/3/1/e000304)
Supplement: inline-supplementary-material-2 [file inline-supplementary-material-2.pdf]

**Table S1.** Country-level stratified Cox proportional hazards models of time-to-incident pregnancy

|                                         | Azerbaijan 2006 |       |         | Burkina Faso 2010 |       |         | Cambodia 2014 |       |         | Colombia 2010 |       |         |
|-----------------------------------------|-----------------|-------|---------|-------------------|-------|---------|---------------|-------|---------|---------------|-------|---------|
|                                         | Beta            | SE    | P-value | Beta              | SE    | P-value | Beta          | SE    | P-value | Beta          | SE    | P-value |
| <b>IPV</b>                              | 0.173           | 0.095 | 0.069   | 1.120             | 0.344 | 0.001   | 0.229         | 0.128 | 0.075   | -0.00235      | 0.039 | 0.952   |
| <b>Age</b>                              |                 |       |         |                   |       |         |               |       |         |               |       |         |
| 15-19                                   | Ref             |       |         |                   |       |         |               |       |         |               |       |         |
| 20-24                                   | -0.120          | 0.527 | 0.820   |                   |       |         |               |       |         |               |       |         |
| 25-29                                   | -0.607          | 0.526 | 0.248   |                   |       |         |               |       |         |               |       |         |
| 30-34                                   | -1.130          | 0.532 | 0.034   |                   |       |         |               |       |         |               |       |         |
| 35-39                                   | -1.214          | 0.536 | 0.024   |                   |       |         |               |       |         |               |       |         |
| <b>Maternal education</b>               |                 |       |         |                   |       |         |               |       |         |               |       |         |
| no education                            | Ref             |       |         | Ref               |       |         |               |       |         |               |       |         |
| primary                                 | -0.186          | 0.338 | 0.582   | -0.119            | 0.056 | 0.032   |               |       |         |               |       |         |
| secondary/higher                        | -0.444          | 0.211 | 0.035   | -0.170            | 0.099 | 0.087   |               |       |         |               |       |         |
| <b>Marital status</b>                   |                 |       |         |                   |       |         |               |       |         |               |       |         |
| married                                 | Ref             |       |         |                   |       |         | Ref           |       |         |               |       |         |
| living together                         | 0.593           | 0.258 | 0.021   |                   |       |         | -0.0813       | 0.698 | 0.907   |               |       |         |
| divorced/not living together            | -1.134          | 0.392 | 0.004   |                   |       |         | -0.530        | 0.325 | 0.103   |               |       |         |
| <b>Partner's education</b>              |                 |       |         |                   |       |         |               |       |         |               |       |         |
| no education                            | Ref             |       |         | Ref               |       |         | Ref           |       |         | Ref           |       |         |
| primary                                 | -0.0516         | 0.687 | 0.940   | 0.00979           | 0.054 | 0.856   | -0.263        | 0.175 | 0.133   | -0.133        | 0.081 | 0.098   |
| secondary or higher                     | 0.449           | 0.570 | 0.430   | -0.295            | 0.085 | 0.000   | -0.190        | 0.184 | 0.302   | -0.119        | 0.083 | 0.151   |
| <b>Age first cohabitation</b>           |                 |       |         |                   |       |         |               |       |         |               |       |         |
| <20                                     | Ref             |       |         | Ref               |       |         | Ref           |       |         |               |       |         |
| >=20                                    | 0.291           | 0.083 | 0.000   | 0.0963            | 0.049 | 0.048   | 0.475         | 0.106 | 0.000   |               |       |         |
| <b>Minority</b>                         | -0.144          | 0.214 | 0.501   | 0.0616            | 0.034 | 0.067   |               |       |         | 0.350         | 0.164 | 0.032   |
| <b>Wealth quintile</b>                  |                 |       |         |                   |       |         |               |       |         |               |       |         |
| Lowest                                  | Ref             |       |         |                   |       |         |               |       |         |               |       |         |
| Low                                     | -0.110          | 0.103 | 0.285   |                   |       |         |               |       |         |               |       |         |
| Middle                                  | -0.103          | 0.113 | 0.362   |                   |       |         |               |       |         |               |       |         |
| High                                    | -0.233          | 0.127 | 0.067   |                   |       |         |               |       |         |               |       |         |
| Highest                                 | -0.192          | 0.146 | 0.188   |                   |       |         |               |       |         |               |       |         |
| <b>Rural residence</b>                  | -0.0984         | 0.093 | 0.288   | 0.157             | 0.053 | 0.003   | -0.354        | 0.151 | 0.019   | -0.110        | 0.048 | 0.021   |
| <b>Proportion of boys/all surviving</b> | -0.163          | 0.085 | 0.055   | 0.00663           | 0.044 | 0.880   | 0.0551        | 0.115 | 0.633   | -0.0256       | 0.043 | 0.548   |
| <b>IPVXIntime</b>                       |                 |       |         | -0.330            | 0.106 | 0.002   |               |       |         |               |       |         |
| Observations                            | 29917           |       |         | 170929            |       |         | 39274         |       |         | 254303        |       |         |

|                                 | Azerbaijan 2006 |    |         | Burkina Faso 2010                    |    |         | Cambodia 2014                            |    |         | Colombia 2010                                            |    |         |
|---------------------------------|-----------------|----|---------|--------------------------------------|----|---------|------------------------------------------|----|---------|----------------------------------------------------------|----|---------|
|                                 | Beta            | SE | P-value | Beta                                 | SE | P-value | Beta                                     | SE | P-value | Beta                                                     | SE | P-value |
| PH test P-value                 | 0.266           |    |         | 0.418                                |    |         | 0.304                                    |    |         | 0.059                                                    |    |         |
| Stratified by                   |                 |    |         | Age, marital status, wealth quintile |    |         | Age, maternal education, wealth quintile |    |         | Age, marital status, maternal education, wealth quintile |    |         |
| Dropped because of collinearity |                 |    |         |                                      |    |         | Minority                                 |    |         | Age at first cohabitation                                |    |         |

|                               | Comoros 2012 |       |         | Egypt 2014 |       |         | Ghana 2008 |       |         | Honduras 2011 |       |         |
|-------------------------------|--------------|-------|---------|------------|-------|---------|------------|-------|---------|---------------|-------|---------|
|                               | Beta         | SE    | P-value | Beta       | SE    | P-value | Beta       | SE    | P-value | Beta          | SE    | P-value |
| <b>IPV</b>                    | 0.384        | 0.130 | 0.003   | 0.0687     | 0.064 | 0.285   | 0.143      | 0.117 | 0.222   | 0.851         | 0.296 | 0.004   |
| <b>Age</b>                    |              |       |         |            |       |         |            |       |         |               |       |         |
| 15-19                         | Ref          |       |         |            |       |         | Ref        |       |         |               |       |         |
| 20-24                         | -0.215       | 0.209 | 0.305   |            |       |         | 0.498      | 0.423 | 0.239   |               |       |         |
| 25-29                         | -0.364       | 0.205 | 0.075   |            |       |         | 0.218      | 0.419 | 0.603   |               |       |         |
| 30-34                         | -0.613       | 0.212 | 0.004   |            |       |         | 0.00791    | 0.424 | 0.985   |               |       |         |
| 35-39                         | -0.747       | 0.216 | 0.001   |            |       |         | -0.424     | 0.431 | 0.326   |               |       |         |
| <b>Maternal education</b>     |              |       |         |            |       |         |            |       |         |               |       |         |
| no education                  | Ref          |       |         | Ref        |       |         | Ref        |       |         | Ref           |       |         |
| primary                       | 0.0750       | 0.093 | 0.420   | -0.0625    | 0.126 | 0.619   | 0.183      | 0.133 | 0.168   | -0.154        | 0.089 | 0.083   |
| secondary/higher              | -0.0802      | 0.103 | 0.436   | -0.0105    | 0.088 | 0.905   | -0.173     | 0.142 | 0.223   | -0.307        | 0.108 | 0.004   |
| <b>Marital status</b>         |              |       |         |            |       |         |            |       |         |               |       |         |
| married                       | Ref          |       |         | Ref        |       |         | Ref        |       |         |               |       |         |
| living together               | 0.124        | 0.327 | 0.704   |            |       |         | -0.166     | 0.130 | 0.202   |               |       |         |
| divorced/not living together  | -0.487       | 0.207 | 0.019   | -3.200     | 1.028 | 0.002   | -0.827     | 0.302 | 0.006   |               |       |         |
| <b>Partner's education</b>    |              |       |         |            |       |         |            |       |         |               |       |         |
| no education                  | Ref          |       |         | Ref        |       |         | Ref        |       |         | Ref           |       |         |
| primary                       | -0.157       | 0.097 | 0.104   | 0.168      | 0.125 | 0.177   | 0.0136     | 0.182 | 0.941   | -0.163        | 0.077 | 0.033   |
| secondary or higher           | -0.0739      | 0.093 | 0.426   | 0.300      | 0.101 | 0.003   | -0.0330    | 0.147 | 0.822   | -0.266        | 0.098 | 0.007   |
| <b>Age first cohabitation</b> |              |       |         |            |       |         |            |       |         |               |       |         |
| <20                           | Ref          |       |         |            |       |         |            |       |         | Ref           |       |         |
| >=20                          | 0.245        | 0.083 | 0.003   |            |       |         |            |       |         | 0.134         | 0.057 | 0.019   |
| <b>Minority</b>               | 0.00456      | 0.368 | 0.990   |            |       |         | -0.0223    | 0.166 | 0.893   | 0.0441        | 0.142 | 0.756   |
| <b>Wealth quintile</b>        |              |       |         |            |       |         |            |       |         |               |       |         |
| Lowest                        | Ref          |       |         | Ref        |       |         | Ref        |       |         |               |       |         |
| Low                           | -0.112       | 0.106 | 0.290   | -0.152     | 0.092 | 0.100   | 0.121      | 0.131 | 0.357   |               |       |         |
| Middle                        | -0.186       | 0.109 | 0.089   | -0.224     | 0.093 | 0.016   | -0.142     | 0.165 | 0.390   |               |       |         |
| High                          | -0.433       | 0.129 | 0.001   | -0.177     | 0.106 | 0.095   | -0.120     | 0.185 | 0.515   |               |       |         |

|                                                    | Comoros 2012 |       |         | Egypt 2014                       |       |         | Ghana 2008             |       |         | Honduras 2011                                 |       |         |
|----------------------------------------------------|--------------|-------|---------|----------------------------------|-------|---------|------------------------|-------|---------|-----------------------------------------------|-------|---------|
|                                                    | Beta         | SE    | P-value | Beta                             | SE    | P-value | Beta                   | SE    | P-value | Beta                                          | SE    | P-value |
| Highest                                            | -0.105       | 0.141 | 0.457   | -0.298                           | 0.127 | 0.019   | -0.0319                | 0.237 | 0.893   |                                               |       |         |
| <b>Rural residence</b>                             | 0.134        | 0.083 | 0.108   | -0.0412                          | 0.088 | 0.641   | 0.137                  | 0.145 | 0.342   | -0.126                                        | 0.065 | 0.054   |
| <b>Proportion of boys/all surviving IPVXIntime</b> | 0.0192       | 0.105 | 0.855   | -0.333                           | 0.073 | 0.000   | -0.0965                | 0.109 | 0.378   | -0.0412                                       | 0.053 | 0.439   |
| Observations                                       | 29742        |       |         | 76264                            |       |         | 22639                  |       |         | 140343                                        |       |         |
| PH test P-value                                    | 0.985        |       |         | 0.713                            |       |         | 0.161                  |       |         | 0.405                                         |       |         |
| Stratified by                                      |              |       |         | Age                              |       |         |                        |       |         | Age category, marital status, wealth quintile |       |         |
| Dropped because of collinearity                    |              |       |         | Minority, age first cohabitation |       |         | Age first cohabitation |       |         |                                               |       |         |

|                                         | India 2005 |       |         | Kenya 2014 |       |         | Kyrgyz Republic 2012 |       |         | Malawi 2010 |       |         |
|-----------------------------------------|------------|-------|---------|------------|-------|---------|----------------------|-------|---------|-------------|-------|---------|
|                                         | Beta       | SE    | P-value | Beta       | SE    | P-value | Beta                 | SE    | P-value | Beta        | SE    | P-value |
| <b>IPV</b>                              | 0.235      | 0.091 | 0.010   | 0.0406     | 0.063 | 0.519   | 0.707                | 0.281 | 0.012   | 0.0145      | 0.054 | 0.787   |
| <b>IPVXIntime</b>                       | -0.0511    | 0.030 | 0.087   |            |       |         | -0.247               | 0.094 | 0.009   |             |       |         |
| <b>Partner's education</b>              |            |       |         |            |       |         |                      |       |         |             |       |         |
| no education                            | Ref        |       |         | Ref        |       |         |                      |       |         | Ref         |       |         |
| Primary                                 | -0.0206    | 0.032 | 0.515   | -0.0792    | 0.102 | 0.437   |                      |       |         | -0.0273     | 0.080 | 0.735   |
| secondary or higher                     | -0.0169    | 0.027 | 0.534   | -0.267     | 0.119 | 0.024   |                      |       |         | -0.219      | 0.095 | 0.022   |
| <b>Age first cohabitation</b>           |            |       |         |            |       |         |                      |       |         |             |       |         |
| <20                                     | Ref        |       |         | Ref        |       |         | Ref                  |       |         | Ref         |       |         |
| >=20                                    | 0.235      | 0.027 | 0.000   | 0.164      | 0.068 | 0.016   | 0.345                | 0.061 | 0.000   | 0.188       | 0.070 | 0.008   |
| <b>Minority</b>                         | 0.00216    | 0.021 | 0.918   | 0.135      | 0.080 | 0.092   | -0.0718              | 0.223 | 0.748   | 0.264       | 0.122 | 0.031   |
| <b>Rural residence</b>                  | -0.0269    | 0.023 | 0.251   | 0.147      | 0.079 | 0.062   | 0.110                | 0.115 | 0.338   | 0.122       | 0.095 | 0.197   |
| <b>Proportion of boys/all surviving</b> | -0.148     | 0.024 | 0.000   | -0.0656    | 0.083 | 0.428   | -0.186               | 0.074 | 0.012   | -0.0962     | 0.064 | 0.131   |
| <b>Maternal education</b>               |            |       |         |            |       |         |                      |       |         |             |       |         |
| no education                            |            |       |         | Ref        |       |         | Ref                  |       |         |             |       |         |
| Primary                                 |            |       |         | -0.154     | 0.107 | 0.151   | 0.110                | 0.177 | 0.536   |             |       |         |
| secondary/higher                        |            |       |         | -0.256     | 0.141 | 0.070   | 0.00188              | 0.100 | 0.985   |             |       |         |
| <b>Marital status</b>                   |            |       |         |            |       |         |                      |       |         |             |       |         |
| Married living together                 |            |       |         | Ref        |       |         | Ref                  |       |         |             |       |         |
|                                         |            |       |         | 0.00994    | 0.122 | 0.935   | -0.389               | 0.843 | 0.645   |             |       |         |

|                                 | India 2005                                                        |    |         | Kenya 2014                    |       |         | Kyrgyz Republic 2012 |       |         | Malawi 2010                                      |       |         |
|---------------------------------|-------------------------------------------------------------------|----|---------|-------------------------------|-------|---------|----------------------|-------|---------|--------------------------------------------------|-------|---------|
|                                 | Beta                                                              | SE | P-value | Beta                          | SE    | P-value | Beta                 | SE    | P-value | Beta                                             | SE    | P-value |
| divorced/not living together    |                                                                   |    |         | -0.576                        | 0.142 | 0.000   | -1.485               | 0.309 | 0.000   |                                                  |       |         |
| <b>Age</b>                      |                                                                   |    |         |                               |       |         |                      |       |         |                                                  |       |         |
| 15-19                           |                                                                   |    |         |                               |       |         | Ref                  |       |         |                                                  |       |         |
| 20-24                           |                                                                   |    |         |                               |       |         | -0.564               | 0.385 | 0.143   |                                                  |       |         |
| 25-29                           |                                                                   |    |         |                               |       |         | -0.958               | 0.382 | 0.012   |                                                  |       |         |
| 30-34                           |                                                                   |    |         |                               |       |         | -1.521               | 0.387 | 0.000   |                                                  |       |         |
| 35-39                           |                                                                   |    |         |                               |       |         | -1.717               | 0.390 | 0.000   |                                                  |       |         |
| <b>Wealth quintile</b>          |                                                                   |    |         |                               |       |         |                      |       |         |                                                  |       |         |
| Lowest                          |                                                                   |    |         |                               |       |         | Ref                  |       |         | Ref                                              |       |         |
| Low                             |                                                                   |    |         |                               |       |         | 0.0489               | 0.090 | 0.586   | -0.116                                           | 0.069 | 0.091   |
| Middle                          |                                                                   |    |         |                               |       |         | -0.0549              | 0.087 | 0.530   | -0.139                                           | 0.066 | 0.036   |
| High                            |                                                                   |    |         |                               |       |         | -0.126               | 0.104 | 0.227   | -0.286                                           | 0.075 | 0.000   |
| Highest                         |                                                                   |    |         |                               |       |         | -0.0319              | 0.146 | 0.827   | -0.273                                           | 0.098 | 0.005   |
| Observations                    | 520322                                                            |    |         | 61702                         |       |         | 52202                |       |         | 90441                                            |       |         |
| PH test P-value                 | 0.296                                                             |    |         | 0.263                         |       |         | 0.083                |       |         | 0.800                                            |       |         |
| Stratified by                   | Age category, marital status, wealth quintile, maternal education |    |         | Age category, wealth quintile |       |         | Partner's education  |       |         | Age category, maternal education, marital status |       |         |
| Dropped because of collinearity |                                                                   |    |         |                               |       |         |                      |       |         |                                                  |       |         |

|                              | Mali 2012 |       |         | Moldova 2005 |       |         | Mozambique 2011 |       |         | Namibia 2013 |       |         |
|------------------------------|-----------|-------|---------|--------------|-------|---------|-----------------|-------|---------|--------------|-------|---------|
|                              | Beta      | SE    | P-value | Beta         | SE    | P-value | Beta            | SE    | P-value | Beta         | SE    | P-value |
| <b>IPV</b>                   | -0.00638  | 0.058 | 0.913   | -0.0127      | 0.136 | 0.926   | 0.0649          | 0.053 | 0.224   | 1.191        | 0.689 | 0.084   |
| <b>Maternal education</b>    |           |       |         |              |       |         |                 |       |         |              |       |         |
| no education                 | Ref       |       |         | Ref          |       |         |                 |       |         | Ref          |       |         |
| Primary                      | 0.00672   | 0.095 | 0.943   | 0.239        | 0.763 | 0.754   |                 |       |         | 0.0326       | 0.269 | 0.904   |
| secondary/higher             | -0.117    | 0.128 | 0.363   | 0.399        | 0.680 | 0.558   |                 |       |         | -0.207       | 0.279 | 0.457   |
| <b>Marital status</b>        |           |       |         |              |       |         |                 |       |         |              |       |         |
| married                      | Ref       |       |         | Ref          |       |         |                 |       |         | Ref          |       |         |
| living together              | 0.222     | 0.262 | 0.397   | 0.452        | 0.232 | 0.052   |                 |       |         | -0.332       | 0.146 | 0.023   |
| divorced/not living together | -0.784    | 0.541 | 0.147   | -0.0989      | 0.238 | 0.678   |                 |       |         | -0.969       | 0.421 | 0.021   |
| <b>Partner's education</b>   |           |       |         |              |       |         |                 |       |         |              |       |         |
| no education                 | Ref       |       |         | Ref          |       |         | Ref             |       |         | Ref          |       |         |
| Primary                      | 0.203     | 0.099 | 0.041   | -0.353       | 0.591 | 0.550   | -0.102          | 0.064 | 0.110   | -0.463       | 0.225 | 0.040   |
| secondary or higher          | -0.0458   | 0.110 | 0.677   | -1.000       | 0.417 | 0.017   | -0.185          | 0.094 | 0.048   | -0.665       | 0.211 | 0.002   |
| <b>Age first</b>             |           |       |         |              |       |         |                 |       |         |              |       |         |

|                                                    | Mali 2012 |              |         | Moldova 2005 |                               |         | Mozambique 2011 |                                                                   |         | Namibia 2013 |                           |         |
|----------------------------------------------------|-----------|--------------|---------|--------------|-------------------------------|---------|-----------------|-------------------------------------------------------------------|---------|--------------|---------------------------|---------|
|                                                    | Beta      | SE           | P-value | Beta         | SE                            | P-value | Beta            | SE                                                                | P-value | Beta         | SE                        | P-value |
| <b>cohabit</b>                                     |           |              |         |              |                               |         |                 |                                                                   |         |              |                           |         |
| <20                                                | Ref       |              |         |              |                               |         | Ref             |                                                                   |         |              |                           |         |
| >=20                                               | 0.152     | 0.070        | 0.029   |              |                               |         | -0.0516         | 0.057                                                             | 0.365   |              |                           |         |
| <b>Minority</b>                                    | 0.0650    | 0.118        | 0.582   | 0.296        | 0.817                         | 0.718   | -0.268          | 0.228                                                             | 0.239   | 0.0527       | 0.165                     | 0.750   |
| <b>Wealth quintile</b>                             |           |              |         |              |                               |         |                 |                                                                   |         |              |                           |         |
| Lowest                                             | Ref       |              |         |              |                               |         |                 |                                                                   |         | Ref          |                           |         |
| Low                                                | 0.00980   | 0.085        | 0.908   |              |                               |         |                 |                                                                   |         | 0.323        | 0.191                     | 0.092   |
| Middle                                             | 0.0558    | 0.088        | 0.525   |              |                               |         |                 |                                                                   |         | 0.222        | 0.237                     | 0.350   |
| High                                               | 0.0527    | 0.093        | 0.570   |              |                               |         |                 |                                                                   |         | 0.439        | 0.234                     | 0.061   |
| Highest                                            | -0.156    | 0.123        | 0.205   |              |                               |         |                 |                                                                   |         | 0.366        | 0.272                     | 0.178   |
| <b>Rural residence</b>                             | 0.0402    | 0.096        | 0.675   | 0.000417     | 0.143                         | 0.998   | -0.0417         | 0.071                                                             | 0.555   | 0.317        | 0.158                     | 0.045   |
| <b>Proportion of boys/all surviving IPVXIntime</b> | -0.133    | 0.075        | 0.076   | 0.00130      | 0.120                         | 0.991   | -0.00291        | 0.066                                                             | 0.965   | 0.0436       | 0.177                     | 0.805   |
| <b>Age</b>                                         |           |              |         |              |                               |         |                 |                                                                   |         |              |                           |         |
| 15-19                                              |           |              |         |              |                               |         |                 |                                                                   |         | Ref          |                           |         |
| 20-24                                              |           |              |         |              |                               |         |                 |                                                                   |         | 0.149        | 0.420                     | 0.722   |
| 25-29                                              |           |              |         |              |                               |         |                 |                                                                   |         | 0.137        | 0.412                     | 0.740   |
| 30-34                                              |           |              |         |              |                               |         |                 |                                                                   |         | -0.0305      | 0.419                     | 0.942   |
| 35-39                                              |           |              |         |              |                               |         |                 |                                                                   |         | -0.309       | 0.428                     | 0.469   |
| Observations                                       | 54865     |              |         | 29340        |                               |         | 78937           |                                                                   |         | 16255        |                           |         |
| PH test P-value                                    | 0.940     |              |         | 0.514        |                               |         | 0.991           |                                                                   |         | 0.148        |                           |         |
| Stratified by                                      |           | Age category |         |              | Age category, wealth quintile |         |                 | Age category, marital status, wealth quintile, maternal education |         |              |                           |         |
| Dropped because of collinearity                    |           |              |         |              | Age at first cohabitation     |         |                 |                                                                   |         |              | Age at first cohabitation |         |

|                            | Nepal 2011 |       |         | Nigeria 2013 |       |         | Pakistan 2012 |       |         | Peru 2012 |       |         |
|----------------------------|------------|-------|---------|--------------|-------|---------|---------------|-------|---------|-----------|-------|---------|
|                            | Beta       | SE    | P-value | Beta         | SE    | P-value | Beta          | SE    | P-value | Beta      | SE    | P-value |
| <b>IPV</b>                 | 0.0292     | 0.096 | 0.761   | 0.398        | 0.184 | 0.030   | 0.129         | 0.065 | 0.047   | 0.484     | 0.290 | 0.095   |
| <b>Partner's education</b> |            |       |         |              |       |         |               |       |         |           |       |         |
| no education               | Ref        |       |         | Ref          |       |         | Ref           |       |         | Ref       |       |         |
| Primary                    | -0.156     | 0.118 | 0.187   | 0.0532       | 0.036 | 0.144   | -0.0331       | 0.093 | 0.721   | -0.110    | 0.195 | 0.571   |
| secondary or higher        | -0.279     | 0.121 | 0.021   | 0.0372       | 0.038 | 0.329   | -0.101        | 0.077 | 0.190   | -0.101    | 0.195 | 0.605   |
| <b>Age first cohabit</b>   |            |       |         |              |       |         |               |       |         |           |       |         |
| <20                        | Ref        |       |         | Ref          |       |         | Ref           |       |         |           |       |         |
| >=20                       | 0.135      | 0.125 | 0.280   | 0.139        | 0.031 | 0.000   | 0.305         | 0.069 | 0.000   |           |       |         |

|                                                    | Nepal 2011                       |       |         | Nigeria 2013                                                      |       |         | Pakistan 2012 |       |         | Peru 2012                                  |       |         |
|----------------------------------------------------|----------------------------------|-------|---------|-------------------------------------------------------------------|-------|---------|---------------|-------|---------|--------------------------------------------|-------|---------|
|                                                    | Beta                             | SE    | P-value | Beta                                                              | SE    | P-value | Beta          | SE    | P-value | Beta                                       | SE    | P-value |
| <b>Minority</b>                                    | 0.275                            | 1.337 | 0.837   | -0.186                                                            | 0.083 | 0.025   | 0.0946        | 0.069 | 0.173   |                                            |       |         |
| <b>Wealth quintile</b>                             |                                  |       |         |                                                                   |       |         |               |       |         |                                            |       |         |
| Lowest                                             | Ref                              |       |         |                                                                   |       |         | Ref           |       |         | <b>Ref</b>                                 |       |         |
| Low                                                | -0.509                           | 0.114 | 0.000   |                                                                   |       |         | -0.157        | 0.088 | 0.074   | -0.373                                     | 0.075 | 0.000   |
| Middle                                             | -0.565                           | 0.129 | 0.000   |                                                                   |       |         | -0.245        | 0.103 | 0.017   | -0.572                                     | 0.098 | 0.000   |
| High                                               | -0.465                           | 0.140 | 0.001   |                                                                   |       |         | -0.228        | 0.106 | 0.031   | -0.653                                     | 0.112 | 0.000   |
| Highest                                            | -1.155                           | 0.183 | 0.000   |                                                                   |       |         | -0.338        | 0.132 | 0.010   | -0.714                                     | 0.142 | 0.000   |
| <b>Rural residence</b>                             | -0.0293                          | 0.123 | 0.812   | -0.00902                                                          | 0.031 | 0.772   | 0.0801        | 0.070 | 0.254   | -0.298                                     | 0.072 | 0.000   |
| <b>Proportion of boys/all surviving IPVXIntime</b> | -0.233                           | 0.105 | 0.026   | 0.0104                                                            | 0.031 | 0.736   | -0.197        | 0.081 | 0.015   | -0.129                                     | 0.066 | 0.049   |
| <b>Maternal education</b>                          |                                  |       |         | -0.109                                                            | 0.058 | 0.060   |               |       |         | -0.187                                     | 0.093 | 0.044   |
| no education                                       |                                  |       |         |                                                                   |       |         | Ref           |       |         | Ref                                        |       |         |
| Primary                                            |                                  |       |         |                                                                   |       |         | 0.0270        | 0.097 | 0.781   | -0.424                                     | 0.134 | 0.002   |
| secondary/higher                                   |                                  |       |         |                                                                   |       |         | -0.0316       | 0.088 | 0.721   | -0.506                                     | 0.141 | 0.000   |
| <b>Marital status</b>                              |                                  |       |         |                                                                   |       |         |               |       |         |                                            |       |         |
| Married                                            |                                  |       |         |                                                                   |       |         | Ref           |       |         | Ref                                        |       |         |
| divorced/not living together                       |                                  |       |         |                                                                   |       |         | -1.077        | 0.767 | 0.160   | -0.504                                     | 0.131 | 0.000   |
| <b>Age</b>                                         |                                  |       |         |                                                                   |       |         |               |       |         |                                            |       |         |
| 15-19                                              |                                  |       |         |                                                                   |       |         |               |       |         | Ref                                        |       |         |
| 20-24                                              |                                  |       |         |                                                                   |       |         |               |       |         | -0.0148                                    | 0.141 | 0.916   |
| 25-29                                              |                                  |       |         |                                                                   |       |         |               |       |         | -0.233                                     | 0.141 | 0.099   |
| 30-34                                              |                                  |       |         |                                                                   |       |         |               |       |         | -0.419                                     | 0.144 | 0.004   |
| 35-39                                              |                                  |       |         |                                                                   |       |         |               |       |         | -0.466                                     | 0.150 | 0.002   |
| living together                                    |                                  |       |         |                                                                   |       |         |               |       |         | -0.00473                                   | 0.063 | 0.940   |
| Observations                                       | 38866                            |       |         | 313608                                                            |       |         | 43561         |       |         | 173614                                     |       |         |
| PH test P-value                                    |                                  |       |         |                                                                   |       |         |               |       |         |                                            |       |         |
| Stratified by                                      | 0.161                            |       |         | 0.317                                                             |       |         | 0.711         |       |         | 0.416                                      |       |         |
|                                                    | Age category, maternal education |       |         | Age category, maternal education, marital status, wealth quintile |       |         | Age category  |       |         |                                            |       |         |
| Dropped because of collinearity                    | Marital status                   |       |         |                                                                   |       |         |               |       |         | Age at first cohabitation, minority status |       |         |

  

|            | Rwanda 2005 |       |         | Sierra Leone 2013 |       |         | Tajikistan 2012 |       |         | Tanzania 2010 |       |         |
|------------|-------------|-------|---------|-------------------|-------|---------|-----------------|-------|---------|---------------|-------|---------|
|            | Beta        | SE    | P-value | Beta              | SE    | P-value | Beta            | SE    | P-value | Beta          | SE    | P-value |
| <b>IPV</b> | 0.121       | 0.067 | 0.069   | 0.644             | 0.388 | 0.097   | 0.0705          | 0.073 | 0.332   | -0.0289       | 0.051 | 0.575   |

|                                                    | Rwanda 2005                                                    |       |         | Sierra Leone 2013                                              |       |         | Tajikistan 2012 |       |         | Tanzania 2010                    |       |         |
|----------------------------------------------------|----------------------------------------------------------------|-------|---------|----------------------------------------------------------------|-------|---------|-----------------|-------|---------|----------------------------------|-------|---------|
|                                                    | Beta                                                           | SE    | P-value | Beta                                                           | SE    | P-value | Beta            | SE    | P-value | Beta                             | SE    | P-value |
| <b>Maternal education</b>                          |                                                                |       |         |                                                                |       |         |                 |       |         |                                  |       |         |
| no education                                       | Ref                                                            |       |         | Ref                                                            |       |         | Ref             |       |         |                                  |       |         |
| Primary                                            | 0.0574                                                         | 0.075 | 0.446   | 0.0791                                                         | 0.086 | 0.356   | 0.330           | 0.246 | 0.180   |                                  |       |         |
| secondary/higher                                   | -0.0585                                                        | 0.149 | 0.695   | -0.0652                                                        | 0.113 | 0.563   | 0.209           | 0.219 | 0.341   |                                  |       |         |
| <b>Partner's education</b>                         |                                                                |       |         |                                                                |       |         |                 |       |         |                                  |       |         |
| no education                                       | Ref                                                            |       |         | Ref                                                            |       |         | Ref             |       |         | Ref                              |       |         |
| Primary                                            | 0.0869                                                         | 0.075 | 0.246   | 0.116                                                          | 0.103 | 0.258   | 0.669           | 0.581 | 0.249   | -0.0474                          | 0.068 | 0.483   |
| secondary or higher                                | 0.0755                                                         | 0.125 | 0.545   | -0.0504                                                        | 0.082 | 0.540   | 0.0613          | 0.556 | 0.912   | 0.00963                          | 0.104 | 0.926   |
| <b>Age first cohabit</b>                           |                                                                |       |         |                                                                |       |         |                 |       |         |                                  |       |         |
| <20                                                | Ref                                                            |       |         | Ref                                                            |       |         | Ref             |       |         | Ref                              |       |         |
| >=20                                               | 0.146                                                          | 0.069 | 0.036   | 0.217                                                          | 0.075 | 0.004   | 0.278           | 0.064 | 0.000   | 0.0604                           | 0.056 | 0.281   |
| <b>Proportion of boys/all surviving IPVXIntime</b> | -0.0429                                                        | 0.079 | 0.588   | 0.0338                                                         | 0.082 | 0.680   | -0.162          | 0.077 | 0.036   | 0.00826                          | 0.067 | 0.902   |
| <b>Minority</b>                                    |                                                                |       |         | -0.207                                                         | 0.119 | 0.083   |                 |       |         |                                  |       |         |
| <b>Marital status</b>                              |                                                                |       |         | -0.00461                                                       | 0.084 | 0.956   |                 |       |         |                                  |       |         |
| Married                                            |                                                                |       |         |                                                                |       |         | Ref             |       |         | Ref                              |       |         |
| living together                                    |                                                                |       |         |                                                                |       |         | -0.143          | 0.709 | 0.840   | -0.749                           | 0.146 | 0.000   |
| divorced/not living together                       |                                                                |       |         |                                                                |       |         | -0.853          | 0.379 | 0.024   | -0.526                           | 0.103 | 0.000   |
| <b>Wealth quintile</b>                             |                                                                |       |         |                                                                |       |         |                 |       |         |                                  |       |         |
| Lowest                                             |                                                                |       |         |                                                                |       |         | Ref             |       |         | Ref                              |       |         |
| Low                                                |                                                                |       |         |                                                                |       |         | -0.000825       | 0.103 | 0.994   | -0.00842                         | 0.068 | 0.901   |
| Middle                                             |                                                                |       |         |                                                                |       |         | -0.00406        | 0.103 | 0.968   | -0.0311                          | 0.072 | 0.666   |
| High                                               |                                                                |       |         |                                                                |       |         | -0.198          | 0.104 | 0.057   | -0.290                           | 0.080 | 0.000   |
| Highest                                            |                                                                |       |         |                                                                |       |         | -0.225          | 0.122 | 0.065   | -0.616                           | 0.122 | 0.000   |
| <b>Rural residence</b>                             |                                                                |       |         |                                                                |       |         | 0.0293          | 0.089 | 0.743   | -0.0110                          | 0.087 | 0.899   |
| Observations                                       | 45583                                                          |       |         | 62528                                                          |       |         | 48890           |       |         | 83682                            |       |         |
| PH test P-value                                    | 0.113                                                          |       |         | 0.812                                                          |       |         | 0.377           |       |         | 0.704                            |       |         |
| Stratified by                                      | Age category, rural residence, marital status, wealth quintile |       |         | Age category, rural residence, marital status, wealth quintile |       |         | Age category    |       |         | Age category, maternal education |       |         |
| Dropped because of collinearity                    | Minority status                                                |       |         |                                                                |       |         | Minority status |       |         | No minority                      |       |         |

|                                         | Timor Leste 2009 |       |         | Ukraine 2007 |       |         | Uganda 2011 |       |         | Zambia 2013 |       |         |
|-----------------------------------------|------------------|-------|---------|--------------|-------|---------|-------------|-------|---------|-------------|-------|---------|
|                                         | Beta             | SE    | P-value | Beta         | SE    | P-value | Beta        | SE    | P-value | Beta        | SE    | P-value |
| <b>IPV</b>                              | 0.634            | 0.379 | 0.094   | -0.0156      | 0.294 | 0.958   | 0.0463      | 0.078 | 0.554   | 0.418       | 0.202 | 0.038   |
| <b>IPVXIntime</b>                       | -0.223           | 0.121 | 0.066   |              |       |         |             |       |         | -0.125      | 0.062 | 0.043   |
| <b>Age</b>                              |                  |       |         |              |       |         |             |       |         |             |       |         |
| 15-19                                   | Ref              |       |         | Ref          |       |         | Ref         |       |         |             |       |         |
| 20-24                                   | -0.203           | 0.253 | 0.423   | -0.500       | 0.515 | 0.332   | -0.222      | 0.169 | 0.191   |             |       |         |
| 25-29                                   | -0.778           | 0.248 | 0.002   | -0.782       | 0.495 | 0.114   | -0.344      | 0.167 | 0.040   |             |       |         |
| 30-34                                   | -0.973           | 0.251 | 0.000   | -1.000       | 0.485 | 0.039   | -0.509      | 0.181 | 0.005   |             |       |         |
| 35-39                                   | -1.196           | 0.254 | 0.000   | -0.889       | 0.521 | 0.088   | -0.661      | 0.196 | 0.001   |             |       |         |
| <b>Partner's education</b>              |                  |       |         |              |       |         |             |       |         |             |       |         |
| no education                            | Ref              |       |         | Ref          |       |         | Ref         |       |         | Ref         |       |         |
| Primary                                 | 0.0553           | 0.097 | 0.570   |              |       |         | 0.0454      | 0.146 | 0.756   | 0.0681      | 0.070 | 0.328   |
| secondary or higher                     | 0.0561           | 0.094 | 0.552   | 31.00        | 1.176 | 0.000   | -0.148      | 0.166 | 0.372   | -0.0136     | 0.072 | 0.850   |
| <b>Age first cohabit</b>                |                  |       |         |              |       |         |             |       |         |             |       |         |
| <20                                     | Ref              |       |         | Ref          |       |         | Ref         |       |         | Ref         |       |         |
| >=20                                    | 0.178            | 0.078 | 0.022   | 0.472        | 0.184 | 0.010   | 0.196       | 0.098 | 0.044   | 0.106       | 0.043 | 0.014   |
| <b>Minority</b>                         | -0.0833          | 0.195 | 0.669   | 0            | .     | .       | 0.0193      | 0.200 | 0.923   | -0.124      | 0.135 | 0.359   |
| <b>Rural residence</b>                  | 0.00125          | 0.094 | 0.989   | 0.368        | 0.236 | 0.119   | 0.302       | 0.128 | 0.018   | 0.143       | 0.047 | 0.002   |
| <b>Proportion of boys/all surviving</b> | -0.199           | 0.100 | 0.046   | -0.0105      | 0.203 | 0.959   | 0.0321      | 0.103 | 0.755   | -0.0353     | 0.047 | 0.457   |
| <b>Marital status</b>                   |                  |       |         |              |       |         |             |       |         |             |       |         |
| Married                                 |                  |       |         | Ref          |       |         | Ref         |       |         |             |       |         |
| living together                         |                  |       |         | 0.148        | 0.299 | 0.620   | -0.0167     | 0.080 | 0.833   |             |       |         |
| divorced/not living together            |                  |       |         | -0.485       | 0.351 | 0.167   | -0.892      | 0.192 | 0.000   |             |       |         |
| <b>Wealth quintile</b>                  |                  |       |         |              |       |         |             |       |         |             |       |         |
| Lowest                                  |                  |       |         | Ref          |       |         | Ref         |       |         |             |       |         |
| Low                                     |                  |       |         | -0.348       | 0.241 | 0.149   | 0.00884     | 0.109 | 0.935   |             |       |         |
| Middle                                  |                  |       |         | -0.422       | 0.272 | 0.122   | 0.0170      | 0.120 | 0.887   |             |       |         |
| High                                    |                  |       |         | -0.668       | 0.345 | 0.053   | 0.0463      | 0.131 | 0.724   |             |       |         |
| Highest                                 |                  |       |         | -0.529       | 0.354 | 0.135   | -0.111      | 0.169 | 0.510   |             |       |         |
| <b>Maternal education</b>               |                  |       |         |              |       |         |             |       |         |             |       |         |
| no education                            |                  |       |         |              |       |         | Ref         |       |         | Ref         |       |         |
| Primary                                 |                  |       |         |              |       |         | 0.0493      | 0.118 | 0.676   | -0.116      | 0.052 | 0.025   |
| secondary/higher                        |                  |       |         |              |       |         | -0.0175     | 0.165 | 0.916   | -0.208      | 0.065 | 0.001   |
| Observations                            | 33289            |       |         | 14662        |       |         | 26322       |       |         | 163664      |       |         |
| PH test P-                              | 0.707            |       |         | 0.207        |       |         | 0.116       |       |         | 0.883       |       |         |



|                                 | Timor Leste 2009                                    |    |         | Ukraine 2007 |    |         | Uganda 2011                                   |    |         | Zambia 2013 |    |         |
|---------------------------------|-----------------------------------------------------|----|---------|--------------|----|---------|-----------------------------------------------|----|---------|-------------|----|---------|
|                                 | Beta                                                | SE | P-value | Beta         | SE | P-value | Beta                                          | SE | P-value | Beta        | SE | P-value |
| value                           | Maternal education, marital status, wealth quintile |    |         |              |    |         | Age category, marital status, wealth quintile |    |         |             |    |         |
| Stratified by                   | Maternal education, marital status, wealth quintile |    |         |              |    |         | Age category, marital status, wealth quintile |    |         |             |    |         |
| Dropped because of collinearity |                                                     |    |         |              |    |         |                                               |    |         |             |    |         |

|                                         | Zimbabwe 2010                                 |       |         |
|-----------------------------------------|-----------------------------------------------|-------|---------|
|                                         | Beta                                          | SE    | P-value |
| <b>IPV</b>                              | 0.802                                         | 0.352 | 0.023   |
| <b>IPVXIntime</b>                       | -0.216                                        | 0.105 | 0.040   |
| no education                            | Ref                                           |       |         |
| primary                                 | 0.0154                                        | 0.232 | 0.947   |
| secondary/higher                        | -0.0274                                       | 0.233 | 0.906   |
| no education                            | Ref                                           |       |         |
| primary                                 | -0.559                                        | 0.203 | 0.006   |
| secondary or higher                     | -0.526                                        | 0.201 | 0.009   |
| <b>Minority</b>                         | -0.260                                        | 0.231 | 0.261   |
| <b>Rural residence</b>                  | 0.0545                                        | 0.106 | 0.608   |
| <b>Proportion of boys/all surviving</b> | -0.128                                        | 0.077 | 0.094   |
| Observations                            | 73038                                         |       |         |
| PH test P-value                         | 0.634                                         |       |         |
| Stratified by                           | Age category, marital status, wealth quintile |       |         |
| Dropped because of collinearity         | Age at first cohabitation                     |       |         |
